# Supplementary material
Source: PubMed Central journal article supplement (PMC6158785)
Supplement: NIHMS60858-supplement-_s.pdf [file NIHMS60858-supplement-_s.pdf]

SUPPORTING INFORMATION The supplemental figures are

Figure S1: Circular dichroism spectra of  $1 \mu\text{M}$   $(5'-\text{CGCGCAATTGCGCG}-3')_2$  without (solid) and with (dotted)  $3 \text{ m}$  triethylene glycol.

Figure S2. Comparison of the absorbance of  $5'-\text{CGCGCAATTGCGCG}-3')_2$  vs. temperature without (open squares, right axis) and with  $3 \text{ m}$  triethylene glycol (open circles, left axis). The melting temperatures are  $55^\circ\text{C}$  and  $46^\circ\text{C}$ , respectively.

Figure S3. Continuous variation analysis at a total concentration of  $100 \text{ nM}$  oligonucleotide and Hoechst using  $3 \text{ m}$  triethylene glycol. The emission intensities are plotted relative to the mole fraction with respect to Hoechst. The fluorescence emission was measured using an emission wavelength of  $446 \text{ nm}$  and excitation wavelength of  $358 \text{ nm}$ . The inflection at  $X_{\text{Hoechst}} = 0.5$  corresponds to 1 Hoechst:oligonucleotide.

Figure S4: Plot of the natural logarithm of the observed equilibrium constant for the association of Hoechst with DNA as a function of the concentration of acetamide (top), betaine (middle), and tetraethylene glycol (bottom). Linear least-squares fit using Eq. 8 gives  $51 \pm 6$  for acetamide,  $51 \pm 3$  for betaine, and  $67 \pm 8$  for tetraethylene glycol. The extrapolation to a  $0.12 \text{ m}$  for the buffer gives  $K = 2.8 (\pm 0.8) \times 10^8 \text{ M}^{-1}$  for acetamide,  $3.5 (\pm 0.4) \times 10^8 \text{ M}^{-1}$  for betaine, and  $0.8 (\pm 0.3) \times 10^8 \text{ M}^{-1}$  for tetraethylene glycol. These values are similar to the  $K = 2.5 (\pm 0.4) \times 10^8 \text{ M}^{-1}$  measured in the buffer alone at  $25^\circ\text{C}$ .

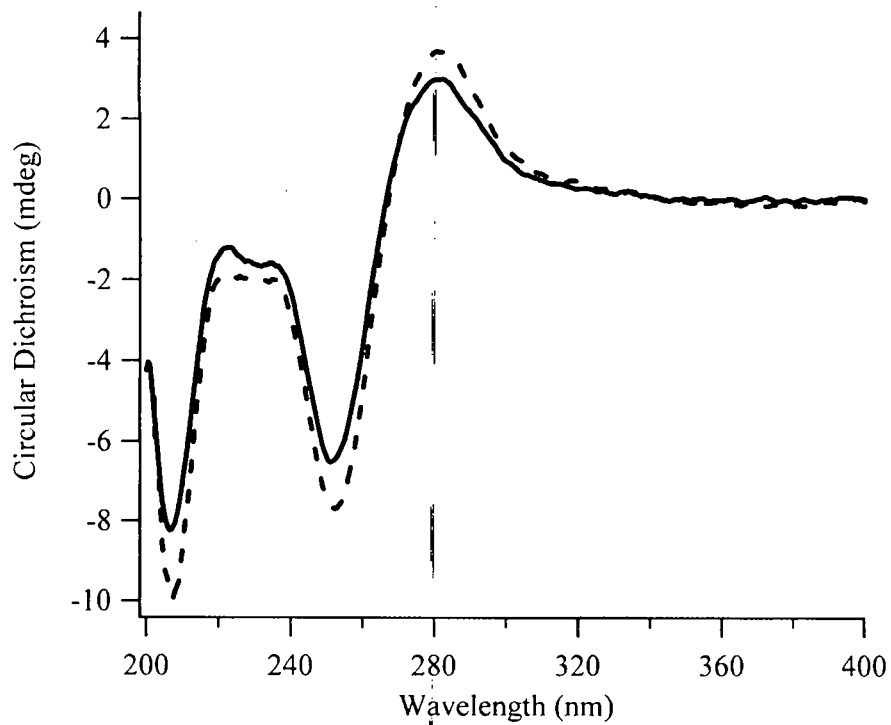

Figure S1

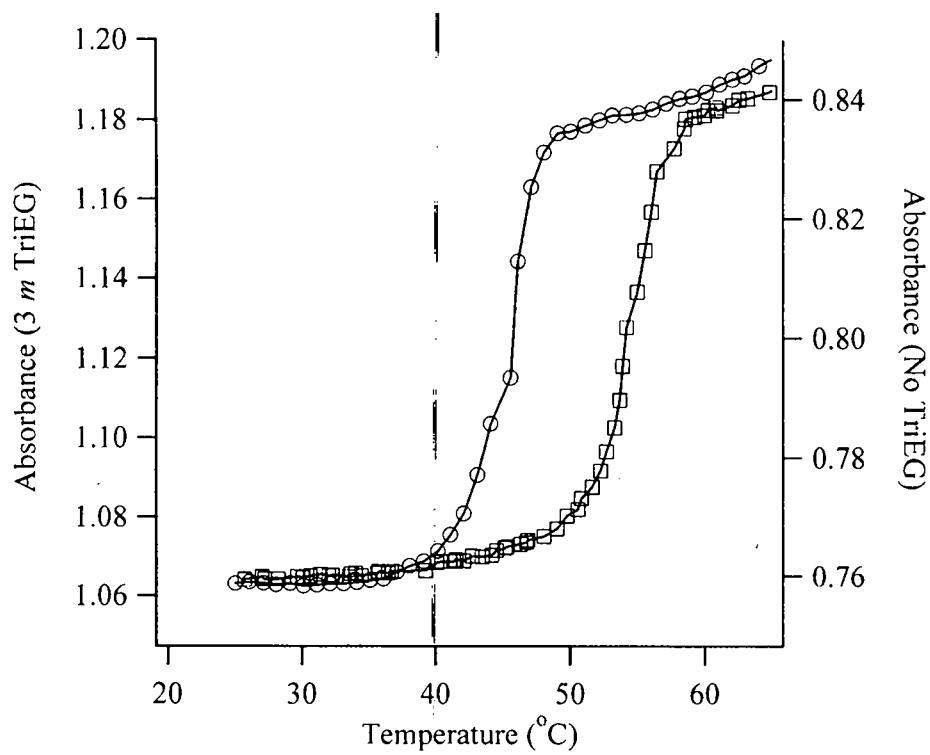

Figure S2

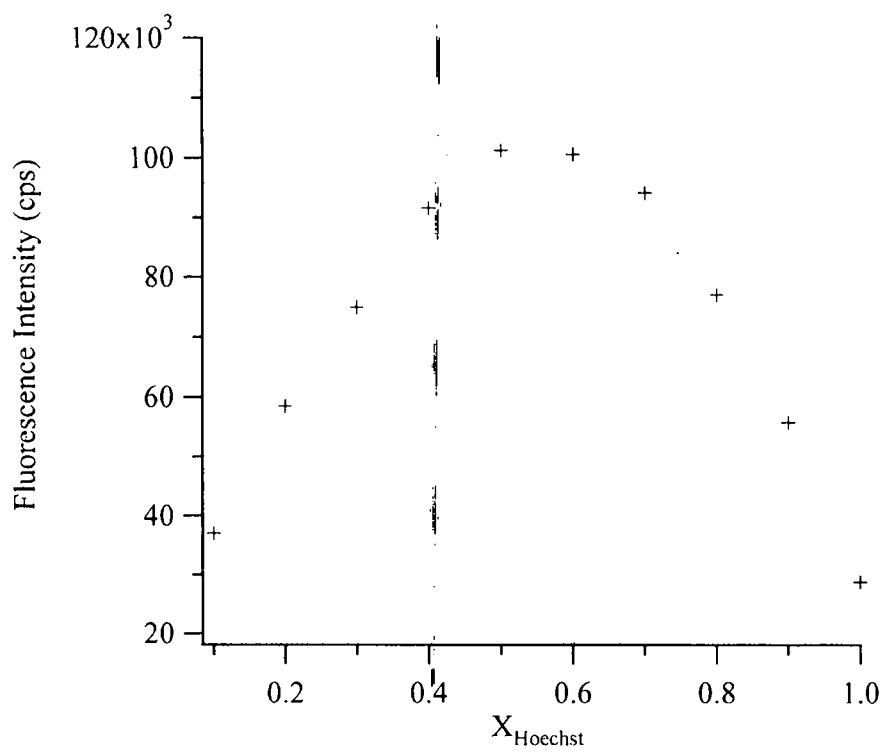

Figure S3

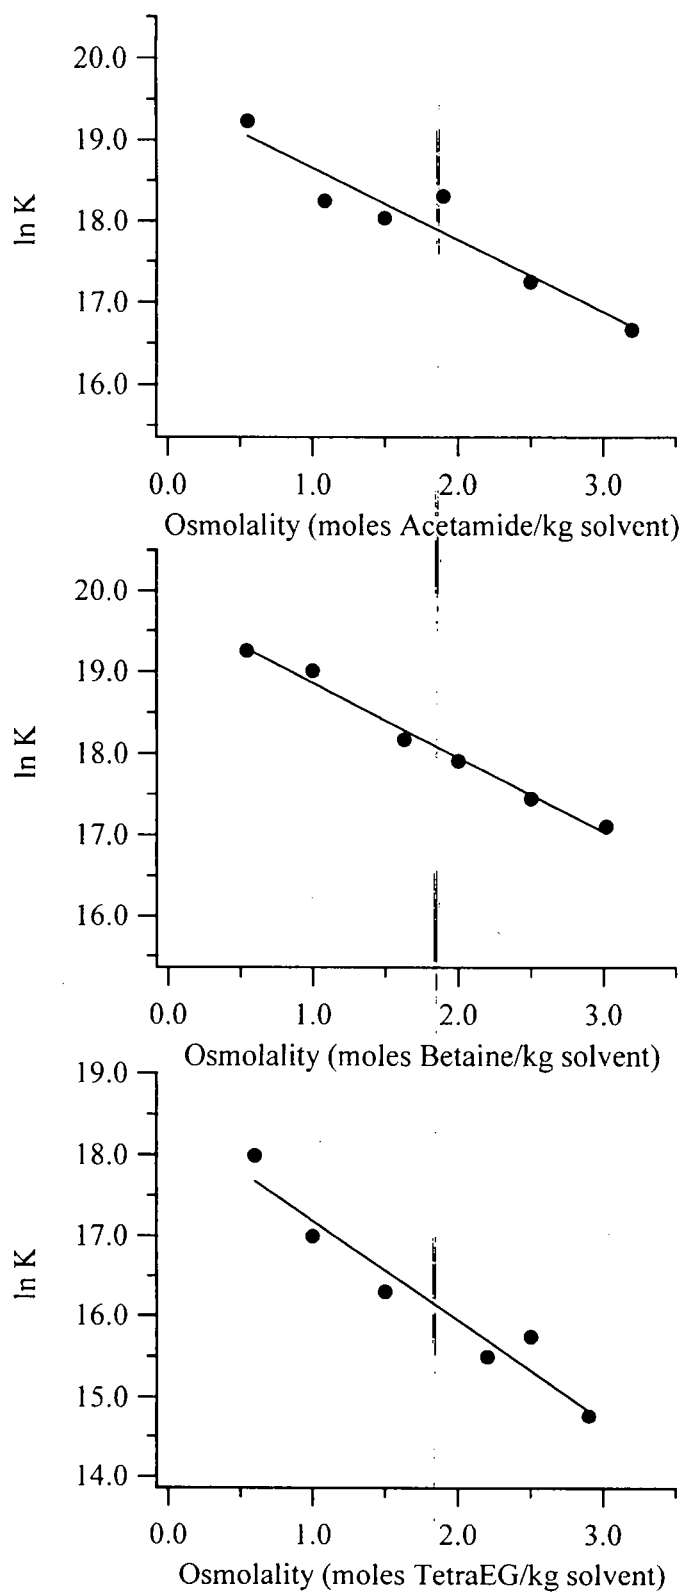

Figure S4
